# Supplementary material
Source: publisher site journal article supplement (https://www.spandidos-publications.com/2867/downloadSupplementary)

Figure S1. GO enrichment analysis of the cis-targets of differentially expressed long non-coding RNAs. GO, Gene Ontology.

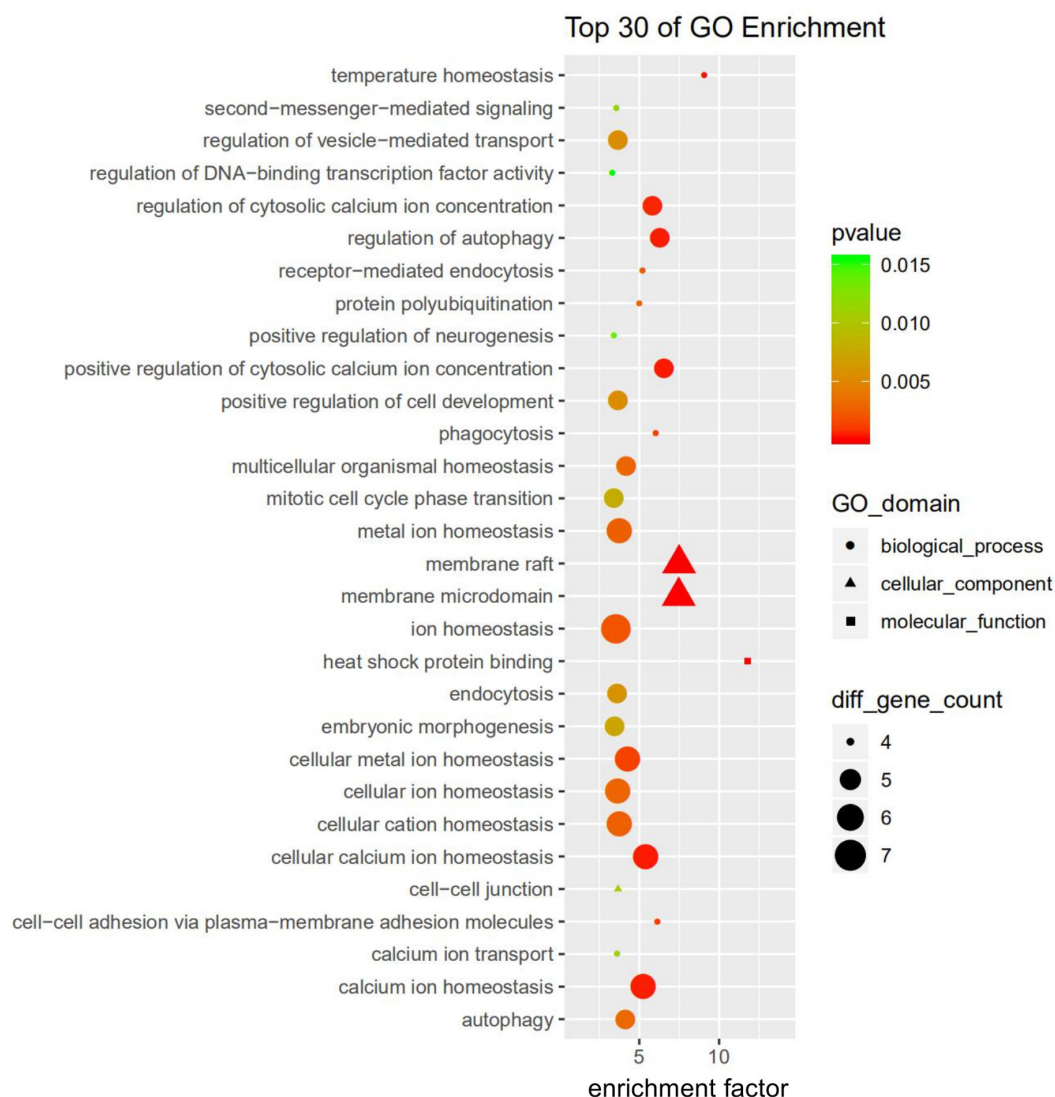

Figure S2. GO enrichment analysis of the trans-targets of differentially expressed long non-coding RNAs. GO, Gene Ontology.

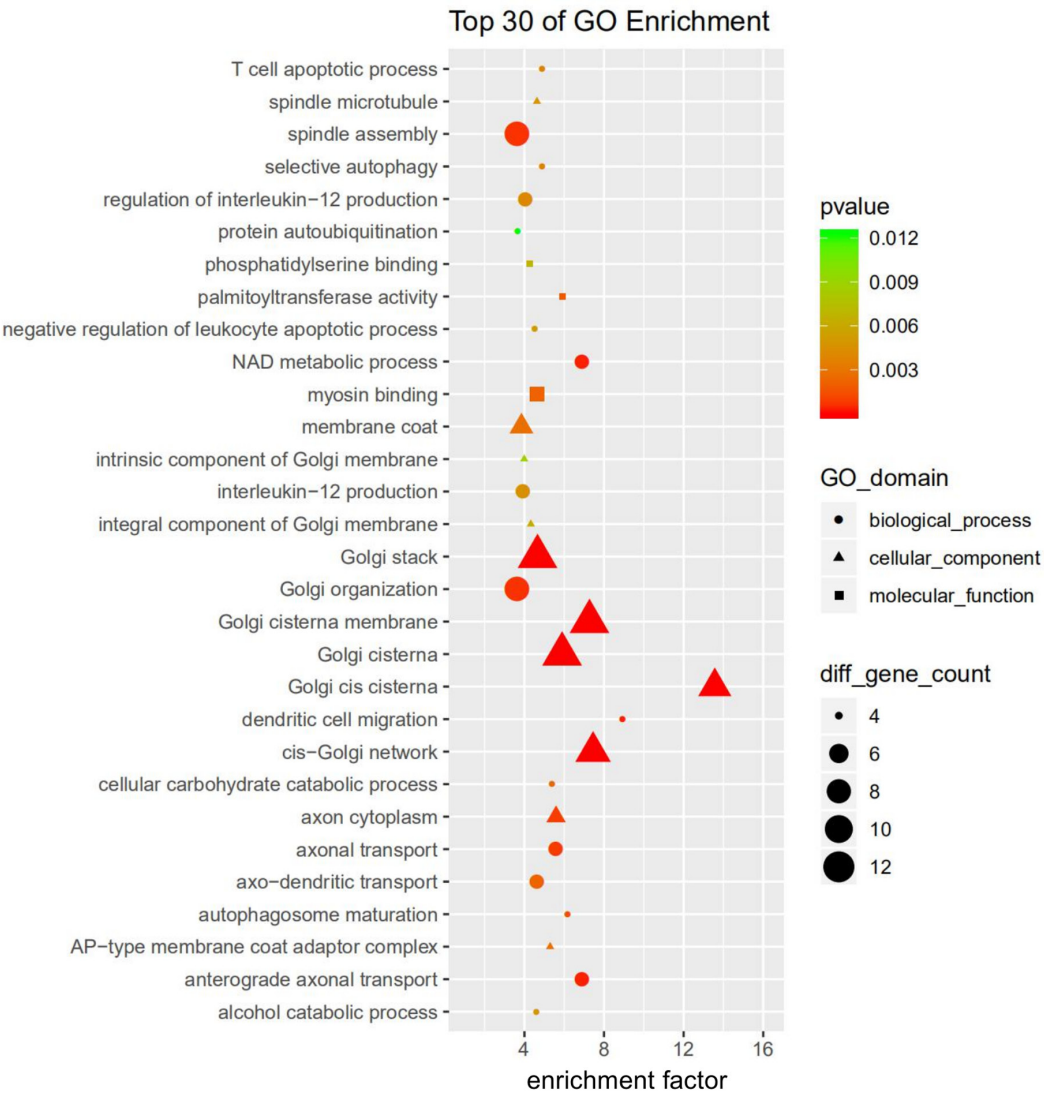

Figure S3. Kyoto Encyclopedia of Genes and Genomes pathway enrichment analysis of the trans-targets of differentially expressed long non-coding RNAs.

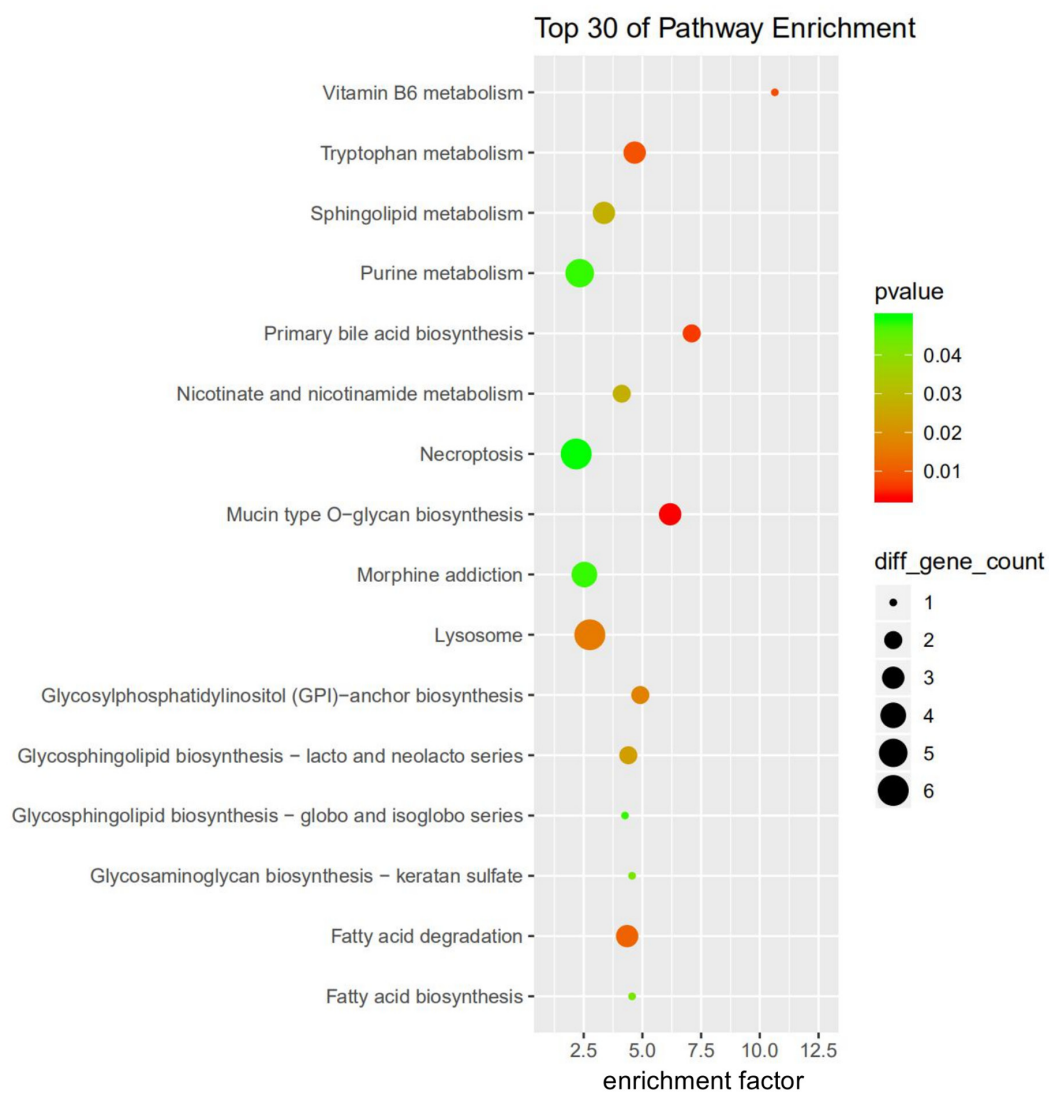

Supplement: Supplementary file 1 [file downloadSupplementary]
